# Supplementary material for: A Systematic Review and Meta-Analysis on the Occurrence of Toxoplasmosis in Animals Slaughtered in Brazilian Abattoirs
Source: Animals (Basel). 2022 Nov 10;12(22):3102. doi: 10.3390/ani12223102 (PMC9686893; doi:10.3390/ani12223102)
Supplement: Supplementary file 1 [file animals-12-03102-s001.zip]

Archive with 6 entries (6 files):
- Suppl Table S1 - PRISMA_2020_checklist.pdf
- Suppl Table S2 - Raw data.xlsx
- Suppl Table S3 - Pigs.xlsx
- Suppl Table S4 - Ruminants.xlsx
- Suppl Table S5 - Equids and avian.xlsx
- Suppl Table S6 -  Viability.xlsx
