# Supplementary material for: A Systematic Review and Meta-Analysis on the Occurrence of Toxoplasmosis in Animals Slaughtered in Brazilian Abattoirs
Source: Animals (Basel). 2022 Nov 10;12(22):3102. doi: 10.3390/ani12223102 (PMC9686893; doi:10.3390/ani12223102)
Supplement: Supplementary file 1 [file animals-12-03102-s001.zip › Suppl Table S2 - Raw data.xlsx]

## Sheet: Plan1
Number	Species	State (origin of animals)	Region	Year	Number of sampled animals	Positive	Negative	Prevalence (%)	Sample	Test used	Risk factor	Reference	Reference number
1	Swine	Minas Gerais	Southeast	2013 to 2014	250	19	231	4.41	Blood	IFAT	Type of Animal Inspection Service, the origin of the animals, the presence of rats in the piggery, the origin of the used water, hygienic and sanitary condition of piggery, routing of waste and disposal of the dead animals	Almeida et al (2015)	[16]
		Rio de Janeiro			181	39	142	9.04
2	Horse	Bahia, Goiás and Piauí	Northeast and Midweast	Not described	192	36	156	18.75	Blood	IFAT	Species, animal origin, purpose of rearing and source of water for animal consumption and contact with cats	Arruda et al (2020)	[11]
	Donkey				208	18	190	8.65
3	Goat	Paraíba	Notheast	2019 to 2020	229	49	180	21.39	Blood	IFAT	Animal origin	Batista et al (2022)	[9]
					38	19	19	0.5	Tissues (Brain, heart and diaphragm) from seropositive	Bioassay
4	Swine	Minas Gerais	Southeast	1999 to 2001	72	0	72	0	Tissues (Heart and tongue)	Bioassay and IFAT	Not evaluated	Brandão et al (2006)	[17]
	Chicken (free range)				28	15	13	53.6	Blood
	Chicken (conventional)				50	0	50	0	Muscle and blood
5	Goat	Paraíba	Northeast	2006	306	75	231	24.5	Blood	IFAT	None	Faria et al (2007)	[18]
6	Swine	Paraíba	Northeast	2012	190	37	153	25.8	Blood	IFAT	Extensive husbandry and feeding with leftovers	Feitosa et al (2014)	[19]
					37	16	21	35.1	Tissues (brain, heart and tongue) from seropositive	Bioassay
7	Swine	Minas Gerais	Southeast	2014	600	20	580	3.3	Blood	IHA	Lineage, animal origin, size of the farm, collective raising with others species, presence of rodents and type of water offered	Marques-Santos et al (2017)	[20]
					600	311	289	51.8		IFAT
8	Swine	Paraná and Santa Catarina	South	2013 to 2014	400	26	374	6.5	Blood	IFAT and/or MAT	Not evaluated	Miura et al (2019)	[21]
					26	18	8	69.2	Tissues (heart, diaphragm, liver, tongue, and masseter) from seropositive (any test or both)	Bioassay
9	Swine (backyard)	Rio Grande do Norte	Northeast	Not described	412	168	244	40.7	Blood	IFAT	Female gender, semi‑confined rearing system, use of well water, dewormed animals, presence of cats, goats, sheep, mice and vultures on the farm and carcasses left on the ground	Santos et al (2019)	[22]
10	Swine	Sergipe	Northeast	2015	230	19	211	8.3	Blood	IFAT	Age	Silva et al (2019)	[23]
11	Swine	Paraíba	Northeast	Not described	120	15	105	12.5	Blood	IFAT	Not evaluated	Feitosa et al (2017)	[24]
					15	12	3	80	Tissues from seropositive	Bioassay
12	Swine	Piauí	Northeast	Not described	141	42	99	29.8	Bllod and heart from seropositive	IFAT	Not evaluated	Rêgo et al (2017)	[25]
					42	16	26	38.1		Bioassay
	Goat				198	85	113	42.9		IFAT
					85	9	76	10.6		Bioassay
	Sheep				87	39	48	44.8		IFAT
					39	0	39	0		Bioassay
13	Sheep	São Paulo	Southeast	Not described	522	40	482	7.7	Blood	IFAT	Not evaluated	Silva & Langoni (2001)	[26]
					40	34	6	85	Tissues (brain and diaphragm) from seropositive	Bioassay
					40	15	35	37.5		PCR
14	Ostriches	São Paulo	Southeast	Not described	344	38	306	11.05	Blood	MAT-HS	Water tank and presence of non-ostrich feces in paddocks	Silva & Langoni (2016)	[27]
					38	14	24	36.84	Brain	Bioassay
					38	25	13	65.79		PCR
15	Goats	Bahia	Northeast	2007 to 2008	102	8	94	7.84	Tissues (brain, tongue and heart)	PCR	Not evaluated	Silva et al (2009)	[28]
16	Bovine	Rondônia	North	2015	1000	53	947	5.3	Blood	IFAT	Animals raised on a feeder/stocker/backgrounder system	Souza et al (2016)	[29]
17	Swine	Paraíba	Northeast	2006	130	47	83	36.2	Blood	IFAT	None	Azevedo et al (2010)	[30]
18	Swine	Bahia	Northeast	Not described	465	85	380	18.27	Blood	ELISA	Animal sex, raising system and origin of the animals	Bezerra et al (2009)	[31]
19	Sheep	Pernambuco	Northeast	Not described	50	13	37	26	Blood	IFAT	Not evaluated	Bezerra et al (2014)	[32]
					13	1	12	7.7	Tissue sfrom the females (uterus, tubes and ovaries) and the fetuses (brain, heart, placenta and umbilical cord)	PCR for seropositive
20	Horse	Paraná, Minas Gerais, Rio de Janeiro, Goiás, Mato Grosso and Mato Grosso do Sul	South, Southeast and Midweast	2009 to 2010	398	46	342	11.6	Blood	IFAT	Not evaluated	Evers et al (2013)	[33]
					398	14	384	3.5	Brain	Bioassay
					398	60	338	15		IFAT + Bioassay
21	Swine	Pernambuco	Northeast	2008	327	32	295	9.78	Blood	IFAT	Not evaluated	Samico-Fernandes et al (2011)	[34]
22	Swine	Rio Grande do Sul	South	2000 to 2001	240	48	192	20	Blood	Indirect hemagglutination	Not evaluated	Fialho & Araujo (2003)	[35]
					240	81	159	33.75		IFAT
23	Swine	Pará	North	Not described	110	55	55	50	Blood	Indirect hemagglutination	Not evaluated	Freitas et al (2009)	[36]
24	Sheep	Rio Grande do Sul	South	1978	100	39	61	39	Blood	Sabin-Feldman Reaction	Not evaluated	Larsson et al (1980)	[37]
25	Swine	Pará	North	Not described	151	14	137	9.3	Blood	IFAT	Not evaluated	Lopes et al (2021)	[38]
26	Swine	Paraná	South	2004 to 2005	408	104	304	25.5	Blood	IFAT	Not evaluated	Millar et al (2008)	[39]
27	Horse	Rio Grande do Sul and Paraná	South	2014	197	93	104	47.2	Blood	IFAT	Not evaluated	Portella et al (2017)	[40]
28	Bovine	Bahia	Northeast	2004 to 2005	600	71	529	11.83	Blood	IFAT	Not evaluated	Spagnol et al. (2009)	[41]
29	Swine	Paraná	South	2002 to 2003	424	17	407	4	Blood	IFAT	Not evaluated	Carletti et al (2005)	[42]
30	Bovine	Pará	North	2010 to 2011	500	203	297	40.6	Blood	IFAT	Not evaluated	Carmo et al (2017)	[43]
31	Bovine (dairy cows)	Santa Catarina (abattoir)	South	Not described	60	29	31	48.3	Blood	IFAT	Not evaluated	Macedo et al (2012a)	[44]
					60	16	44	26.6	Blood or fetuses	Bioassay
32	Swine	Paraná (abattoir)	South	2005	117	10	107	8.54	Blood	IFAT	Not evaluated	Moura et al (2007)	[45]
	Sheep				157	11	146	7
33	Swine	Paraná	South	2013	500	63	437	12.6	Blood	IFAT	Not evaluated	Santos et al (2015)	[46]
34	Bovine (female)	Paraná (abattoir)	South	2007	169	44	125	26	Blood	IFAT	Age (older)	Garcia et al (2012)	[47]
35	Sheep	Alagoas (abattoir)	Northeast	Not described	100	14	86	14	Blood	IFAT	Not evaluated	Nunes et al (2015)	[48]
					14	3	11	21.4	Tissues (cerebrum, cerebellum, pons, spinal cord and heart) from seropositive	PCR
					14	1	13	7.14		Immunohistochemistry
36	Swine	Rio Grande do Sul (abattoir)	South	Not described	50	33	17	66	Tongue	PCR	Not evaluated	Belfort-Neto et al (2007)	[49]
						17	33	34	Diaphragm
37	Bovine	Minas Gerais	Southeast	2009	1195	32	1163	2.68	Blood	IFAT	Number of seropositive cattle and the presence and number of resident cats, presence and number of stray cats, presence of cats walking freely, rat control by using cats and feed storage	Fajardo et al (2013)	[50]
38	Swine	Rio de Janeiro	Southeast	Not described	406	31	375	7.64	Blood	IFAT	None	Luciano et al (2011)	[51]
	Bovine				459	9	450	1.96
39	Horses	Rio Grande do Sul	South	2016	40	13	27	32.5	Blood	MAT	Not evaluated	Pena et al (2018)	[52]
					13	1	12	7.7	Tissues (brain and heart) from seropositive	Bioassay
40	Swine	Pernambuco	Northeast	Not described	305	38	267	12.5	Blood	IFAT	Not evaluated	Samico-Fernandes et al (2012)	[53]
					38	21	17	55.2	Heart	PCR
41	Swine (backyard)	Pernambuco	Northeast	Not described	224	85	139	37.9	Blood	IFAT	Age (older)	Samico-Fernandes et al (2017)	[54]
					85	12	73	14.1	Tissues (liver, heart, brain, lung and diaphragm) from seropositive	PCR
42	Sheep	São Paulo (abattoir)	Southeast	Not described	602	66	536	10.96	Blood	MAT and IFAT	Not evaluated	Silva et al (2011)	[55]
					66	22	44	33	Tissues samples (brain, lung and muscle, diaphragm and heart) from seropositive	PCR
					66	20	46	30		Bioassay
43	Swine	São Paulo (abattoir)	Southeast	Not described	300	29	271	9.6	Blood	ELISA and Western Blot	Not evaluated	Suaréz-Aranda et al (2000)	[56]
44	Swine	Rio Grande do Norte	Northeast	Not described	18	8	10	44.5	Blood	ELISA	Not evaluated	Andrade et al (2013)	[57]
					8	5	3	62.5	Heart	Bioassay
	Sheep				223	19	204	8.52	Blood	ELISA
					19	0	19	0	Heart	Bioassay
	Goat				50	10	40	20	Blood	ELISA
					10	1	9	10	Heart	Bioassay
	Chicken (free range)				43	30	13	69.8	Blood	ELISA
					30	13	27	43.3	Brain	Bioassay
45	Bovine (female)	São Paulo (abattoir)	Southeast	Not described	50	9	41	18	Blood	IFAT	Not evaluated	Costa et al (2011)	[58]
46	Swine	Rio Grande do Sul	South	2017 to 2018	35	9	26	25.7	Heart	PCR	Not evaluated	Costa et al (2020)	[59]
47	Ostriches	Rio de Janeiro (abattoir)	Southeast	Not described	20	16	4	80	Blood	MAT	Not evaluated	Gallo et al (2019)	[60]
48	Swine	Pernambuco	Northeast	Not described	92	50	42	54.3	Blood	IFAT	Not evaluated	Samico-Fernandes et al (2015)	[61]
					50	1	49	2	Tissues (heart, lung, liver, brain, and diaphragm) from seropositive	Bioassay
49	Bovine	Bahia	Northeast	2008	100	26	74	26	Blood	IFAT	Not evaluated	Santos et al (2010)	[62]
					26	2	24	7.7	Brain and heart	PCR
50	Swine	Maranhão	Northeast	2017 to 2018	60	44	16	77	Blood	IFAT	Not evaluated	Silva et al (2021a)	[10]
					60	40	20	33.33	Tissues (Tongue, masseter and diaphragm)	PCR
51	Sheep	Paraíba	Northeast	2019 to 2020	205	63	142	30.7	Blood	IFAT	Females, extensive breeding system, and purebred animals	Silva et al (2021b)	[63]
					61	29	32	47.5	Tissues (heart, diaphragm, and brain) from seropositive	Bioassay
52	Sheep	Minas Gerais (abattoir)	Southeast	2007	594	57	537	9.57	Blood	ELISA	Not evaluated	Dorneles et al (2020)	[12]
53	Bovine (female)	Santa Catarina (abattoir)	South	2008 to 2009	120	35	185	29.1	Blood	IFAT	Pregnant and breed	Macedo et al (2012b)	[64]
54	Bovine	Paraná (abattoir)	South	2005	250	77	173	30.8	Blood	IFAT	Age and breed	Moura et al (2010)	[65]
55	Swine	São Paulo and Minas Gerais	Southeast	2003	262	0	262	0	Blood	MAD	Not evaluated	Pezerico et al (2007)	[66]
56	Goats	Paraíba	Northeast	Not described	97	25	72	27.5	Blood	IFAT	Not evaluated	Silva et al (2015)	[67]
	Sheep				100	25	75	25
57	Swine	Rio Grande do Sul	South	Not described	50	4	46	8	Blood	IFAT	Not evaluated	Vansetto et al (2020)	[68]
