# Supplementary material for: A Systematic Review and Meta-Analysis on the Occurrence of Toxoplasmosis in Animals Slaughtered in Brazilian Abattoirs
Source: Animals (Basel). 2022 Nov 10;12(22):3102. doi: 10.3390/ani12223102 (PMC9686893; doi:10.3390/ani12223102)
Supplement: Supplementary file 1 [file animals-12-03102-s001.zip › Suppl Table S3 - Pigs.xlsx]

## Sheet: Plan1
Number	State (origin of animals)	Region	Year	Number of sampled animals	Positive	Negative	Prevalence (%)	Sample	Test used	Reference	Reference number
1	Minas Gerais	Southeast	2013 to 2014	250	19	231	4.41	Blood	IFAT	Almeida et al (2015)	[16]
	Rio de Janeiro			181	39	142	9.04
2	Minas Gerais	Southeast	1999 to 2001	72	0	72	0	Tissues (Heart and tongue)	Bioassay and IFAT	Brandão et al (2006)	[17]
3	Paraíba	Northeast	2012	190	37	153	25.8	Blood	IFAT	Feitosa et al (2014)	[19]
4	Minas Gerais	Southeast	2014	600	20	580	3.3	Blood	IHA	Marques-Santos et al (2017)	[20]
				600	311	289	51.8		IFAT
5	Paraná and Santa Catarina	South	2013 to 2014	400	26	374	6.5	Blood	IFAT and/or MAT	Miura et al (2019)	[21]
6	Rio Grande do Norte	Northeast	Not described	412	168	244	40.7	Blood	IFAT	Santos et al (2019)	[22]
7	Sergipe	Northeast	2015	230	19	211	8.3	Blood	IFAT	Silva et al (2019)	[23]
8	Paraíba	Northeast	Not described	120	15	105	12.5	Blood	IFAT	Feitosa et al (2017)	[24]
9	Piauí	Northeast	Not described	141	42	99	29.8	Bllod	IFAT	Rêgo et al (2017)	[25]
10	Paraíba	Northeast	2006	130	47	83	36.2	Blood	IFAT	Azevedo et al (2010)	[30]
11	Bahia	Northeast	Not described	465	85	380	18.27	Blood	ELISA	Bezerra et al (2009)	[31]
12	Pernambuco	Northeast	2008	327	32	295	9.78	Blood	IFAT	Samico-Fernandes et al (2011)	[34]
13	Rio Grande do Sul	South	2000 to 2001	240	48	192	20	Blood	Indirect hemagglutination	Fialho & Araujo (2003)	[35]
				240	81	159	33.75		IFAT
14	Pará	North	Not described	110	55	55	50	Blood	Indirect hemagglutination	Freitas et al (2009)	[36]
15	Pará	North	Not described	151	14	137	9.3	Blood	IFAT	Lopes et al (2021)	[38]
16	Paraná	South	2004 to 2005	408	104	304	25.5	Blood	IFAT	Millar et al (2008)	[39]
17	Paraná	South	2002 to 2003	424	17	407	4	Blood	IFAT	Carletti et al (2005)	[42]
18	Paraná (abattoir)	South	2005	117	10	107	8.54	Blood	IFAT	Moura et al (2007)	[45]
19	Paraná	South	2013	500	63	437	12.6	Blood	IFAT	Santos et al (2015)	[46]
20	Rio Grande do Sul (abattoir)	South	Not described	50	33	17	66	Tongue	PCR	Belfort-Neto et al (2007)	[49]
					17	33	34	Diaphragm
21	Rio de Janeiro	Southeast	Not described	406	31	375	7.64	Blood	IFAT	Luciano et al (2011)	[51]
22	Pernambuco	Northeast	Not described	305	38	267	12.5	Blood	IFAT	Samico-Fernandes et al (2012)	[53]
23	Pernambuco	Northeast	Not described	224	85	139	37.9	Blood	IFAT	Samico-Fernandes et al (2017)	[54]
24	São Paulo (abattoir)	Southeast	Not described	300	29	271	9.6	Blood	ELISA and Western Blot	Suaréz-Aranda et al (2000)	[56]
25	Rio Grande do Norte	Northeast	Not described	18	8	10	44.5	Blood	ELISA	Andrade et al (2013)	[57]
26	Rio Grande do Sul	South	2017 to 2018	35	9	26	25.7	Heart	PCR	Costa et al (2020)	[59]
27	Pernambuco	Northeast	Not described	92	50	42	54.3	Blood	IFAT	Samico-Fernandes et al (2015)	[61]
28	Maranhão	Northeast	2017 to 2018	60	44	16	77	Blood	IFAT	Silva et al (2021a)	[10]
				60	40	20	33.33	Tissues (Tongue, masseter and diaphragm)	PCR
29	São Paulo and Minas Gerais	Southeast	2003	262	0	262	0	Blood	MAD	Pezerico et al (2007)	[66]
30	Rio Grande do Sul	South	Not described	50	4	46	8	Blood	IFAT	Vansetto et al (2020)	[68]
The word "abattoir" in the States column was used when animals origin was not available and we considered the abattoir location.
