# Supplementary material for: A Systematic Review and Meta-Analysis on the Occurrence of Toxoplasmosis in Animals Slaughtered in Brazilian Abattoirs
Source: Animals (Basel). 2022 Nov 10;12(22):3102. doi: 10.3390/ani12223102 (PMC9686893; doi:10.3390/ani12223102)
Supplement: Supplementary file 1 [file animals-12-03102-s001.zip › Suppl Table S4 - Ruminants.xlsx]

## Sheet: Plan1
Number	Specie	State (origin of animals)	Region	Year	Number of sampled animals	Positive	Negative	Prevalence (%)	Sample	Test used	Reference	Reference number
1	Bovine	Rondônia	North	2015	1000	53	947	5.3	Blood	IFAT	Souza et al (2016)	[29]
2	Bovine	Bahia	Northeast	2004 to 2005	600	71	529	11.83	Blood	IFAT	Spagnol et al. (2009)	[41]
3	Bovine	Pará	North	2010 to 2011	500	203	297	40.6	Blood	IFAT	Carmo et al (2017)	[43]
4	Bovine	Santa Catarina (abattoir)	South	Not described	60	29	31	48.3	Blood	IFAT	Macedo et al (2012a)	[44]
5	Bovine	Minas Gerais	Southeast	2009	1195	32	1163	2.68	Blood	IFAT	Fajardo et al (2013)	[50]
6	Bovine	Rio de Janeiro	Southeast	Not described	459	9	450	1.96	Blood	IFAT	Luciano et al (2011)	[51]
7	Bovine	Bahia	Northeast	2008	100	26	74	26	Blood	IFAT	Santos et al (2010)	[62]
8	Bovine	Paraná (abattoir)	South	2005	250	77	173	30.8	Blood	IFAT	Moura et al (2010)	[65]
9	Bovine	Paraná (abattoir)	South	2007	169	44	125	26	Blood	IFAT	Garcia et al (2012)	[47]
10	Bovine	São Paulo (abattoir)	Southeast	Not described	50	9	41	18	Blood	IFAT	Costa et al (2011)	[58]
11	Bovine	Santa Catarina (abattoir)	South	2008 to 2009	120	35	185	29.1	Blood	IFAT	Macedo et al (2012b)	[64]
1	Goat	Paraíba	Notheast	2019 to 2020	229	49	180	21.39	Blood	IFAT	Batista et al (2022)	[9]
2	Goat	Paraíba	Northeast	2006	306	75	231	24.5	Blood	IFAT	Faria et al (2007)	[18]
3	Goat	Piauí	Northeast	Not described	198	85	113	42.9	Blood	IFAT	Rêgo et al (2017)	[25]
4	Goat	Rio Grande do Norte	Northeast	Not described	50	10	40	20	Blood	ELISA	Andrade et al (2013)	[57]
5	Goat	Bahia	Northeast	2007 to 2008	102	8	94	7.84	Tissues (brain, tongue and heart)	PCR	Silva et al (2009)	[28]
6	Goat	Paraíba	Northeast	Not described	97	25	72	27.5	Blood	IFAT	Silva et al (2015)	[67]
1	Sheep	Piauí	Northeast	Not described	87	39	48	44.8	Blood	IFAT	Rêgo et al (2017)	[25]
2	Sheep	São Paulo	Southeast	Not described	522	40	482	7.7	Blood	IFAT	Silva & Langoni (2001)	[26]
3	Sheep	Pernambuco	Northeast	Not described	50	13	37	26	Blood	IFAT	Bezerra et al (2014)	[32]
4	Sheep	Rio Grande do Sul	South	1978	100	39	61	39	Blood	Sabin-Feldman Reaction	Larsson et al (1980)	[37]
5	Sheep	Paraná (abattoir)	South	2005	157	11	146	7	Blood	IFAT	Moura et al (2007)	[45]
6	Sheep	Alagoas (abattoir)	Northeast	Not described	100	14	86	14	Blood	IFAT	Nunes et al (2015)	[48]
7	Sheep	São Paulo (abattoir)	Southeast	Not described	602	66	536	10.96	Blood	MAT and IFAT	Silva et al (2011)	[55]
8	Sheep	Rio Grande do Norte	Northeast	Not described	223	19	204	8.52	Blood	ELISA	Andrade et al (2013)	[57]
9	Sheep	Paraíba	Northeast	2019 to 2020	205	63	142	30.7	Blood	IFAT	Silva et al (2021b)	[63]
10	Sheep	Minas Gerais (abattoir)	Southeast	2007	594	57	537	9.57	Blood	ELISA	Dorneles et al (2020)	[12]
11	Sheep	Paraíba	Northeast	Not described	100	25	75	25	Blood	IFAT	Silva et al (2015)	[67]
The word "abattoir" in the States column was used when animals origin was not available and we considered the abattoir location.
