# Supplementary material for: A Systematic Review and Meta-Analysis on the Occurrence of Toxoplasmosis in Animals Slaughtered in Brazilian Abattoirs
Source: Animals (Basel). 2022 Nov 10;12(22):3102. doi: 10.3390/ani12223102 (PMC9686893; doi:10.3390/ani12223102)
Supplement: Supplementary file 1 [file animals-12-03102-s001.zip › Suppl Table S5 - Equids and avian.xlsx]

## Sheet: Plan1
Number	Specie	State (origin of animals)	Region	Year	Number of sampled animals	Positive	Negative	Prevalence (%)	Sample	Test used	Reference	Reference number
1	Donkey/Horse	Goias	Midweast	Not described	170	36	134	21.17	Blood	IFAT	Arruda et al (2020)	[11]
		Piaui/Bahia	Northeast	Not described	230	18	212	7.82
2	Horse	Parana	South	2009 to 2010	152	37	115	24.2	Blood	IFAT	Evers et al (2013)	[33]
		Minas Gerais/Rio de Janeiro	Southeast	2009 to 2010	92	12	80	13
		Goiás, Mato Grosso do Sul, and Mato Grosso	Midweast	2009 to 2010	154	11	143	7.1
3	Horse	Rio Grande do Sul and Paraná	South	2014	197	93	104	47.2	Blood	IFAT	Portella et al (2017)	[40]
4	Horse	Rio Grande do Sul	South	2016	40	13	27	32.5	Blood	MAT	Pena et al (2018)	[52]
1	Chicken	Minas Gerais	Southeast	2001 to 2001	78	15	63	19.23	Muscle and blood	IFAT	Brandão et al (2006)	[17]
2	Chicken	Rio Grande do Norte	Northeast	Not described	43	30	13	69.8	Blood	ELISA	Andrade et al (2013)	[57]
3	Ostriches	São Paulo	Southeast	Not described	344	38	306	11.05	Blood	MAT-HS	Silva & Langoni (2016)	[27]
4	Ostriches	Rio de Janeiro (abattoir)	Southeast	Not described	20	16	4	80	Blood	MAT	Gallo et al (2019)	[60]
The word "abattoir" in the States column was used when animals origin was not available and we considered the abattoir location.
