# Supplementary material for: A Systematic Review and Meta-Analysis on the Occurrence of Toxoplasmosis in Animals Slaughtered in Brazilian Abattoirs
Source: Animals (Basel). 2022 Nov 10;12(22):3102. doi: 10.3390/ani12223102 (PMC9686893; doi:10.3390/ani12223102)
Supplement: Supplementary file 1 [file animals-12-03102-s001.zip › Suppl Table S6 - Viability.xlsx]

## Sheet: Plan1
Number	Species	Number of sampled animals	Positive	Negative	Frequency (%)	Sample	Test used	Reference	Reference number
1	Goat	38	19	19	0.5	Tissues (Brain, heart and diaphragm) from seropositive	Bioassay	Batista et al (2022)	[9]
2	Swine	37	16	21	35.1	Tissues (brain, heart and tongue) from seropositive	Bioassay	Feitosa et al (2014)	[19]
3	Swine	26	18	8	69.2	Tissues (heart, diaphragm, liver, tongue, and masseter) from seropositive	Bioassay	Miura et al (2019)	[21]
4	Swine	15	12	3	80	Tissues from seropositive	Bioassay	Feitosa et al (2017)	[24]
5	Swine	42	16	26	38.1	Blood and heart from seropositive	Bioassay	Rêgo et al (2017)	[25]
	Goat	85	9	76	10.6
	Sheep	39	0	39	0
6	Sheep	40	34	6	85	Tissues (brain and diaphragm) from seropositive	Bioassay	Silva & Langoni (2001)	[26]
		40	15	35	37.5		PCR
7	Ostriches	38	14	24	36.84	Brain from seropositive	Bioassay	Silva & Langoni (2016)	[27]
		38	25	13	65.79		PCR
8	Sheep	13	1	12	7.7	Tissue sfrom the females (uterus, tubes and ovaries) and the fetuses (brain, heart, placenta and umbilical cord) from seropositive	PCR	Bezerra et al (2014)	[32]
9	Horse	398	14	384	3.5	Brain	Bioassay	Evers et al (2013)	[33]
10	Bovine (dairy cows)	60	16	44	26.6	Blood or fetuses	Bioassay	Macedo et al (2012a)	[44]
11	Sheep	14	3	11	21.4	Tissues (cerebrum, cerebellum, pons, spinal cord and heart) from seropositive	PCR	Nunes et al (2015)	[48]
		14	1	13	7.14		Immunohistochemistry
12	Swine	50	33	17	66	Tongue	PCR	Belfort-Neto et al (2007)	[49]
			17	33	34	Diaphragm
13	Horses	13	1	12	7.7	Tissues (brain and heart) from seropositive	Bioassay	Pena et al (2018)	[52]
14	Swine	38	21	17	55.2	Heart from seropositive	PCR	Samico-Fernandes et al (2012)	[53]
15	Swine (backyard)	85	12	73	14.1	Tissues (liver, heart, brain, lung and diaphragm) from seropositive	PCR	Samico-Fernandes et al (2017)	[54]
16	Sheep	66	22	44	33	Tissues samples (brain, lung and muscle, diaphragm and heart) from seropositive	PCR	Silva et al (2011)	[55]
	Sheep	66	20	46	30		Bioassay
17	Swine	8	5	3	62.5	Heart	Bioassay	Andrade et al (2013)	[57]
	Sheep	19	0	19	0
	Goat	10	1	9	10
	Chicken (free range)	30	13	27	43.3	Brain
18	Swine	35	9	26	25.7	Heart	PCR	Costa et al (2020)	[59]
19	Swine	50	1	49	2	Tissues (heart, lung, liver, brain, and diaphragm) from seropositive	Bioassay	Samico-Fernandes et al (2015)	[61]
20	Bovine	26	2	24	7.7	Brain and heart	PCR	Santos et al (2010)	[62]
21	Swine	60	40	20	33.33	Tissues (Tongue, masseter and diaphragm)	PCR	Silva et al (2021a)	[10]
22	Sheep	61	29	32	47.5	Tissues (heart, diaphragm, and brain) from seropositive	Bioassay	Silva et al (2021b)	[63]
